# Supplementary material
Source: ML conference proceedings conference paper supplement (https://proceedings.mlr.press/v97/jang19a.html)
Supplement: Supplementary file [file jang19a-supp.pdf]

## Appendix

### A. Comparison to other methods

In this section, we compare DBSCAN++ against replacing the nearest-neighbor search needed for DBSCAN with an approximate nearest neighbor method using the FLANN (<https://www.cs.ubc.ca/research/flann/>) library, and we call it ANN DBSCAN.

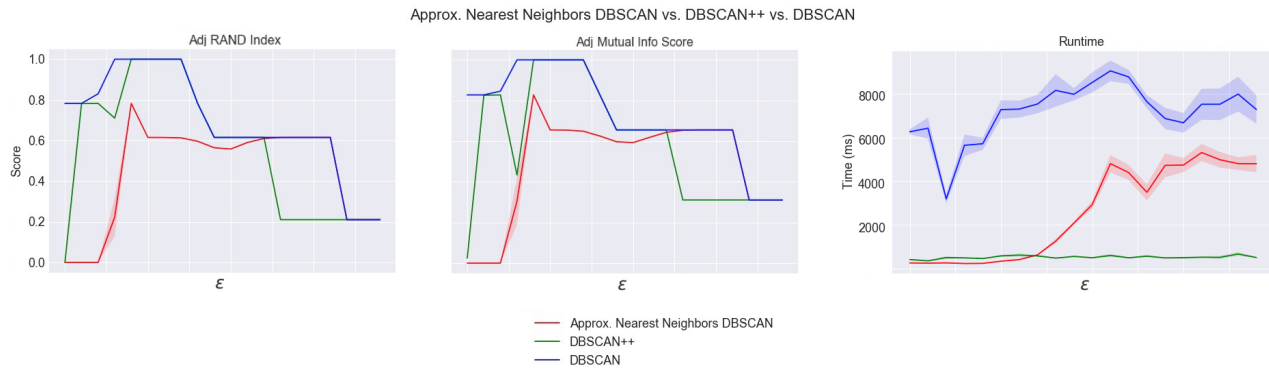

**Figure 9. DBSCAN using approximate nearest neighbors vs. DBSCAN++ vs. DBSCAN.** Experimental results on a synthetic dataset of 10,000 points drawn from five 50-dimensional uniform distributions run on DBSCAN++, DBSCAN, and DBSCAN using a fast approximate nearest neighbors algorithm from the FLANN library. DBSCAN++ was run with  $K$ -center initialization and  $m/n = 0.1$ . All algorithms were run with  $minPts = 10$ . ANN DBSCAN shows a comparable speedup to DBSCAN++ but poorer performance compared to both DBSCAN and DBSCAN++, whereas DBSCAN++ shows both comparable performance to DBSCAN and comparable runtime to ANN DBSCAN.
